# Supplementary material
Source: Research Square preprint supplement (doi:10.21203/rs.3.rs-9079185/v1)
Supplement: Supplementary file 1 [file d9b51318bb3cce777a27cfa0.docx]

**Supplementary Information for "Hydrological Drought Propagation is Memory-driven but Recovery is Event-driven"**

**Supplementary Table 1 |** Static basin characteristics from GAGES-II used in this study

*32 attributes from 7 thematic categories selected based on hypothesized relevance to drought propagation. Human modification variables were excluded from Reference basin models.*

| **Category** | **Variable** | **Description** |
| --- | --- | --- |
| **Hydrology** |  |  |
|  | STREAMS_KM_SQ_KM | Stream density (km/km²) |
|  | STRAHLER_MAX | Maximum Strahler stream order |
|  | BFI_AVE | Long-term average baseflow index |
|  | CONTACT | Subsurface flow contact time index |
|  | PERDUN | Fraction of Dunne overland flow |
|  | PERHOR | Fraction of Horton overland flow |
|  | TOPWET | Topographic wetness index |
|  | RUNAVE7100 | Mean annual runoff (mm) |
| **Climate** |  |  |
|  | PPTAVG_BASIN | Mean annual precipitation (mm) |
|  | T_AVG_BASIN | Mean annual temperature (°C) |
|  | RH_BASIN | Mean annual relative humidity (%) |
|  | PET | Mean annual potential evapotranspiration (mm) |
|  | SNOW_PCT_PRECIP | Fraction of precipitation as snow |
|  | PRECIP_SEAS_IND | Precipitation seasonality index |
| **Topography** |  |  |
|  | ELEV_MEAN_M_BASIN | Mean basin elevation (m a.s.l.) |
|  | DRAIN_SQKM | Drainage area (km²) |
|  | SLOPE_PCT | Mean basin slope (%) |
|  | RRMEAN | Relief ratio |
|  | ASPECT_EASTNESS | Basin aspect eastness index |
|  | ASPECT_NORTHNESS | Basin aspect northness index |
| **Soils & Geology** |  |  |
|  | GEOL_REEDBUSH_DOM_PCT | Dominant geologic type (%) |
|  | HGA | Hydrologic soil group A (%) |
|  | HGB | Hydrologic soil group B (%) |
|  | HGC | Hydrologic soil group C (%) |
|  | HGD | Hydrologic soil group D (%) |
|  | PERMAVE | Mean soil permeability (cm/hr) |
|  | RFACT | Rainfall erosivity factor |
|  | BDAVE | Mean soil bulk density (g/cm³) |
|  | AWCAVE | Available water capacity (cm/cm) |
|  | ROCKDEPAVE | Mean depth to bedrock (cm) |
|  | WTDEPAVE | Mean depth to water table (cm) |
| **Morphology** |  |  |
|  | BAS_COMPACTNESS | Basin compactness ratio |
| **Land Cover** |  |  |
|  | FORESTNLCD06 | Forest cover fraction (NLCD 2006) |
|  | CROPSNLCD06 | Cropland fraction (NLCD 2006) |
|  | GRASSNLCD06 | Grassland fraction (NLCD 2006) |
|  | SHRUBNLCD06 | Shrubland fraction (NLCD 2006) |
|  | WOODYWETNLCD06 | Woody wetland fraction (NLCD 2006) |
|  | EMERGWETNLCD06 | Emergent wetland fraction (NLCD 2006) |
|  | DEVNLCD06 | Developed land fraction (NLCD 2006) |
| **Human Modification** |  |  |
|  | NDAMS_2009 | Number of dams (NID 2009) |
|  | STOR_NID_2009 | Total NID dam storage (megaliters) |
|  | RAW_DIS_NEAREST_DAM | Distance to nearest dam (km) |
|  | RAW_AVG_DIS_ALLDAMS | Mean distance to all dams (km) |
|  | RAW_DIS_NEAREST_MAJ_DAM | Distance to nearest major dam (km) |

*Source: Falcone (2011), GAGES-II: Geospatial Attributes of Gages for Evaluating Streamflow, version II. U.S. Geological Survey.*

**Supplementary Table 2 |** Confirmatory basin-level stepwise regression results for four drought response targets across CONUS. Standardised regression coefficients (β) are shown for the three highest-ranked predictors in each model. These results serve as confirmatory evidence for the XGBoost + SHAP findings presented in the main text.

| **Target** | **Subset** | **N** | **R²** | **Predictor 1** | **β** | **Predictor 2** | **β** | **Predictor 3** | **β** |
| --- | --- | --- | --- | --- | --- | --- | --- | --- | --- |
| **SPEI/SSI 3-month accumulation** |  |  |  |  |  |  |  |  |  |
| Propagation lag | All | 3,590 | 0.72 | Antecedent SSI | 0.69 | Mean elevation | 0.29 | Dynamic BFI | −0.15 |
|  | Ref | 702 | 0.73 | Antecedent SSI | 0.65 | Mean elevation | 0.35 | Dynamic BFI | −0.15 |
|  | Non-ref | 2,888 | 0.72 | Antecedent SSI | 0.70 | Mean elevation | 0.29 | Mean PET | 0.14 |
| Recovery lag | All | 3,590 | 0.35 | Mean elevation | 0.32 | Mean PET | 0.29 | Antecedent SSI | 0.23 |
|  | Ref | 702 | 0.60 | Mean PET | 0.47 | Antecedent SSI | 0.24 | Dunne overland flow | −0.23 |
|  | Non-ref | 2,888 | 0.33 | Mean elevation | 0.33 | Mean PET | 0.23 | Antecedent SSI | 0.22 |
| Attenuated % | All | 3,590 | 0.23 | Dynamic BFI | 0.47 | Mean PET | 0.28 | Discharge CV | 0.25 |
|  | Ref | 702 | 0.33 | Dynamic BFI | 0.56 | Discharge CV | 0.36 | Mean PET | 0.29 |
|  | Non-ref | 2,888 | 0.22 | Dynamic BFI | 0.44 | Discharge CV | 0.23 | Mean PET | 0.22 |
| Independent % | All | 3,590 | 0.04 | Antecedent SSI | 0.13 | Mean PET | 0.11 | Grassland fraction | −0.08 |
|  | Ref | 702 | 0.03 | Antecedent SSI | 0.17 | Dunne overland flow | 0.09 | — | — |
|  | Non-ref | 2,888 | 0.04 | Mean PET | 0.14 | Antecedent SSI | 0.11 | Mean slope | 0.08 |
| **SPEI/SSI 6-month accumulation** |  |  |  |  |  |  |  |  |  |
| Propagation lag | All | 3,595 | 0.67 | Antecedent SSI | 0.73 | Mean elevation | 0.18 | Mean PET | 0.15 |
|  | Ref | 701 | 0.70 | Antecedent SSI | 0.76 | Mean precipitation | −0.19 | Dynamic BFI | −0.10 |
|  | Non-ref | 2,894 | 0.67 | Antecedent SSI | 0.73 | Mean elevation | 0.22 | Mean PET | 0.16 |
| Recovery lag | All | 3,595 | 0.32 | Mean PET | 0.31 | Mean elevation | 0.20 | Dynamic BFI | 0.20 |
|  | Ref | 701 | 0.47 | Mean PET | 0.41 | Dynamic BFI | 0.34 | Discharge CV | 0.20 |
|  | Non-ref | 2,894 | 0.32 | Mean elevation | 0.22 | Mean PET | 0.22 | Dynamic BFI | 0.20 |
| Attenuated % | All | 3,595 | 0.27 | Dynamic BFI | 0.37 | Mean PET | 0.32 | Relative humidity | −0.23 |
|  | Ref | 701 | 0.36 | Dynamic BFI | 0.63 | Mean elevation | −0.42 | Discharge CV | 0.40 |
|  | Non-ref | 2,894 | 0.26 | Dynamic BFI | 0.35 | Mean PET | 0.30 | Mean slope | −0.24 |
| Independent % | All | 3,595 | 0.03 | Mean precipitation | 0.13 | Antecedent SSI | 0.11 | Discharge CV | 0.06 |
|  | Ref | 701 | 0.03 | Antecedent SSI | 0.15 | Mean precipitation | 0.11 | — | — |
|  | Non-ref | 2,894 | 0.03 | Mean precipitation | 0.14 | Antecedent SSI | 0.11 | Discharge CV | 0.07 |

*Antecedent SSI = mean standardised streamflow index over 3 months preceding meteorological drought onset; Dynamic BFI = dynamic baseflow index computed from 3-year trailing discharge window (Eq. 4); Discharge CV = coefficient of variation of daily discharge; Mean PET = mean potential evapotranspiration; Mean elevation = mean basin elevation (m a.s.l.); Mean precipitation = mean annual precipitation (mm); Relative humidity = mean annual relative humidity (%); Dunne overland flow = fraction of Dunne overland flow; Mean slope = mean basin slope (%); Grassland fraction = grassland cover fraction (NLCD 2006). — indicates fewer than three predictors entered the model.*

**Supplementary Table 3 |** Confirmatory event-level stepwise regression results for propagation lag and recovery lag across CONUS. Standardised regression coefficients (β) are shown for the four highest-ranked predictors. The emergence of SSI false recoveries as the dominant recovery predictor at event level is consistent with the XGBoost + SHAP analysis presented in the main text.

| **Target** | **Subset** | **N** | **R²** | **Predictor 1** | **β** | **Predictor 2** | **β** | **Predictor 3** | **β** | **Predictor 4** | **β** |
| --- | --- | --- | --- | --- | --- | --- | --- | --- | --- | --- | --- |
| **SPEI/SSI 3-month accumulation** |  |  |  |  |  |  |  |  |  |  |  |
| Propagation lag | All | 39,412 | 0.53 | Antecedent SSI | 0.60 | Mean elevation | 0.37 | SSI intensity | −0.17 | Mean PET | 0.15 |
|  | Ref | 8,463 | 0.53 | Antecedent SSI | 0.57 | Mean elevation | 0.40 | SSI intensity | −0.16 | Mean PET | 0.14 |
|  | Non-ref | 30,949 | 0.53 | Antecedent SSI | 0.61 | Mean elevation | 0.36 | SSI intensity | −0.16 | Mean PET | 0.15 |
| Recovery lag | All | 39,412 | 0.42 | SSI false recoveries | 0.50 | Mean elevation | 0.29 | Mean PET | 0.24 | Antecedent SSI | 0.18 |
|  | Ref | 8,463 | 0.44 | SSI false recoveries | 0.45 | Mean elevation | 0.34 | Mean PET | 0.32 | SSI intensity | −0.20 |
|  | Non-ref | 30,949 | 0.42 | SSI false recoveries | 0.51 | Mean elevation | 0.26 | Antecedent SSI | 0.18 | SSI intensity | −0.17 |
| **SPEI/SSI 6-month accumulation** |  |  |  |  |  |  |  |  |  |  |  |
| Propagation lag | All | 32,682 | 0.54 | Antecedent SSI | 0.60 | Mean elevation | 0.26 | SPEI intensity | −0.23 | SPEI false recoveries | 0.20 |
|  | Ref | 7,115 | 0.55 | Antecedent SSI | 0.57 | Mean elevation | 0.25 | SPEI intensity | −0.24 | Mean PET | 0.17 |
|  | Non-ref | 25,567 | 0.54 | Antecedent SSI | 0.61 | Mean elevation | 0.27 | SPEI intensity | −0.22 | SPEI false recoveries | 0.21 |
| Recovery lag | All | 32,682 | 0.46 | SSI false recoveries | 0.59 | SSI intensity | −0.22 | Mean PET | 0.21 | Mean elevation | 0.17 |
|  | Ref | 7,115 | 0.50 | SSI false recoveries | 0.58 | Mean PET | 0.27 | SSI intensity | −0.25 | Dynamic BFI | 0.19 |
|  | Non-ref | 25,567 | 0.46 | SSI false recoveries | 0.58 | SSI intensity | −0.21 | Antecedent SSI | 0.15 | Mean PET | 0.15 |

*SSI false recoveries = count of times SSI temporarily rose above the drought threshold before final termination (Eq. 3); Antecedent SSI = mean standardised streamflow index over 3 months preceding meteorological drought onset; SPEI intensity = mean SPEI during meteorological drought; SSI intensity = mean SSI during hydrological drought; SPEI false recoveries = SPEI false recovery count; Dynamic BFI = dynamic baseflow index (Eq. 4); Mean PET = mean potential evapotranspiration; Mean elevation = mean basin elevation (m a.s.l.). Stepwise selection used p-enter = 0.05, p-remove = 0.10.*

**Supplementary Table 4 |** Cross-validation sensitivity: standard KFold versus spatially blocked GroupKFold for event-level XGBoost models. Basin-level models (one row per basin) are not affected by within-basin leakage and use standard KFold throughout. ΔR²cv = GroupKFold − Standard KFold; negative values indicate minor optimistic bias in the standard approach. All R²cv values reported in the main text use GroupKFold for event-level models.

| **Scale** | **Target** | **Subset** | **N** | **Standard KFold R²cv** | **GroupKFold R²cv** | **ΔR²cv** | **RMSE (GroupKFold)** |
| --- | --- | --- | --- | --- | --- | --- | --- |
| **3-month timescale** |  |  |  |  |  |  |  |
| 3-mo event | Propagation lag | All | 39,412 | 0.636 | 0.622 | −0.014 | 1.253 |
| 3-mo event | Propagation lag | Ref | 8,463 | 0.631 | 0.613 | −0.017 | 1.209 |
| 3-mo event | Propagation lag | Non-ref | 30,949 | 0.634 | 0.617 | −0.017 | 1.272 |
| 3-mo event | Recovery lag | All | 39,412 | 0.555 | 0.539 | −0.016 | 3.272 |
| 3-mo event | Recovery lag | Ref | 8,463 | 0.544 | 0.538 | −0.006 | 2.870 |
| 3-mo event | Recovery lag | Non-ref | 30,949 | 0.542 | 0.528 | −0.014 | 3.411 |
| **6-month timescale** |  |  |  |  |  |  |  |
| 6-mo event | Propagation lag | All | 32,682 | 0.625 | 0.629 | +0.005 | 1.388 |
| 6-mo event | Propagation lag | Ref | 7,115 | 0.627 | 0.610 | −0.018 | 1.368 |
| 6-mo event | Propagation lag | Non-ref | 25,567 | 0.614 | 0.623 | +0.009 | 1.413 |
| 6-mo event | Recovery lag | All | 32,682 | 0.579 | 0.570 | −0.009 | 4.778 |
| 6-mo event | Recovery lag | Ref | 7,115 | 0.565 | 0.565 | 0.000 | 4.153 |
| 6-mo event | Recovery lag | Non-ref | 25,567 | 0.570 | 0.556 | −0.014 | 5.012 |

*GroupKFold uses basin identifier (GAGE_ID) as the grouping variable, ensuring all events from a given basin appear in the same fold. SHAP feature-importance rankings were identical between the two cross-validation strategies (not shown). Ref = GAGES-II Reference basins; Non-ref = Non-reference basins.*

**Supplementary Table 5 | Cross-timescale comparison of ecoregion-level event XGBoost R²cv (3-month vs 6-month accumulation). Δ = R²cv(6-mo) − R²cv(3-mo). BFI sign agree? shows how many of the two targets (propagation, recovery) have concordant BFI mean SHAP sign across timescales.**

| **Ecoregion** | **CLASS** | **N** | **Prop R²cv** |  |  | **Rec R²cv** |  |  | **BFI sign** |
| --- | --- | --- | --- | --- | --- | --- | --- | --- | --- |
|  |  | **(3-mo)** | **3-mo** | **6-mo** | **Δ** | **3-mo** | **6-mo** | **Δ** | **agree?** |
| Central Plains | Ref | 793 | 0.441 | 0.401 | -0.040 | 0.318 | 0.375 | +0.058 | 2/2 |
| Central Plains | Non-ref | 5,713 | 0.531 | 0.500 | -0.032 | 0.505 | 0.507 | +0.002 | 0/2 |
| Eastern Highlands | Ref | 1,454 | 0.387 | 0.327 | -0.060 | 0.260 | 0.500 | +0.239 | 2/2 |
| Eastern Highlands | Non-ref | 3,754 | 0.418 | 0.334 | -0.084 | 0.479 | 0.477 | -0.002 | 2/2 |
| Mixed Wood Shield | Ref | 195 | 0.257 | 0.411 | +0.154 | 0.281 | -0.083 | -0.364 | 1/2 |
| Mixed Wood Shield | Non-ref | 449 | 0.172 | 0.359 | +0.187 | 0.141 | 0.176 | +0.035 | 1/2 |
| North East | Ref | 884 | 0.037 | 0.119 | +0.082 | 0.083 | 0.126 | +0.043 | 1/2 |
| North East | Non-ref | 3,833 | 0.384 | 0.293 | -0.091 | 0.345 | 0.395 | +0.050 | 2/2 |
| SE Coastal Plain | Ref | 330 | 0.363 | 0.582 | +0.218 | 0.199 | 0.208 | +0.008 | 1/2 |
| SE Coastal Plain | Non-ref | 1,124 | 0.487 | 0.715 | +0.228 | 0.346 | 0.378 | +0.032 | 1/2 |
| SE Plains | Ref | 1,190 | 0.293 | 0.293 | -0.000 | 0.211 | 0.389 | +0.178 | 1/2 |
| SE Plains | Non-ref | 4,300 | 0.349 | 0.361 | +0.011 | 0.437 | 0.503 | +0.066 | 1/2 |
| Western Mountains | Ref | 2,738 | 0.774 | 0.684 | -0.090 | 0.638 | 0.588 | -0.050 | 2/2 |
| Western Mountains | Non-ref | 7,000 | 0.695 | 0.623 | -0.072 | 0.558 | 0.582 | +0.025 | 2/2 |
| Western Plains | Ref | 547 | 0.450 | 0.433 | -0.017 | 0.303 | 0.270 | -0.034 | 2/2 |
| Western Plains | Non-ref | 2,671 | 0.487 | 0.525 | +0.038 | 0.319 | 0.420 | +0.101 | 2/2 |
| Western Xeric | Ref | 332 | 0.507 | 0.484 | -0.023 | 0.136 | 0.356 | +0.220 | 1/2 |
| Western Xeric | Non-ref | 2,105 | 0.547 | 0.547 | +0.000 | 0.449 | 0.421 | -0.028 | 2/2 |

*Bold Δ values indicate absolute change > 0.10. The largest discrepancy occurs in Mixed Wood Shield Ref recovery (Δ = −0.364, N = 189–195), consistent with small-sample instability. BFI sign reversals occur exclusively in subsets where |mean SHAP| < 0.05, indicating negligible effect sizes.*
